# Supplementary material
Source: PubMed Central journal article supplement (PMC4726572)
Supplement: AHC15020-S1.pdf [file AHC15020-S1.pdf]

## Supplementary Figure 1

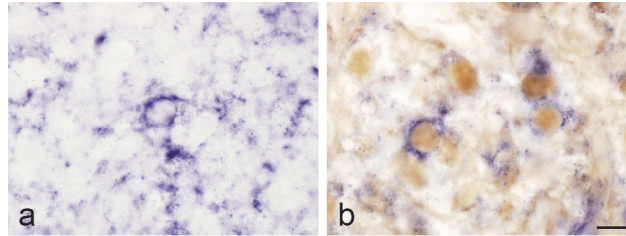

**Supplementary Fig. 1.** *In situ* hybridization of TIMP2 in the posterior lobe of the rat pituitary. TIMP2 mRNA was detected in pituicyte cytoplasm (a). TIMP2-expressing pituicytes were identified by S100 protein immunoreactivity (b). *In situ* hybridization with NBT/BCIP is blue and immunostaining with 3,3'-diaminobenzidine is brown. Bar=10  $\mu$ m (a, b).
